# Supplementary material
Source: publisher figshare collection journal article supplement (https://geolsoc.figshare.com/ndownloader/files/5426273)
Supplement: Supplementary file 1 [file 5426273]

SA1 Hornblende,,,,,,,,Weighted average of J from standards = 3.304e-03 +/- 6.786e-06,,,,,,,,,,,,,,,,,,,
Laser,Cum.,40Ar/39Ar,+/-,37Ar/39Ar,+/-,36Ar/39Ar,+/-,% Atm.,Ca/K,+/-,Cl/K,+/-,40Ar*/39ArK,+/-,Age,+/-,,,,,,,,,,,
(mW),39Ar,measured, ,measured, ,measured, ,40Ar, , , , , , ,(Ma) ,(Ma) ,,,,,,,,,,,
300,0.0020,509.399,19.570,5.2164,0.2138,0.82277,0.03559,47.7,9.604,0.395,0.10965,0.00554,267.54,11.52,1142.7,36.5,,,,,,,,,,,
600,0.0063,275.554,4.252,4.6880,0.0770,0.45586,0.01197,48.8,8.628,0.142,0.03654,0.00188,141.60,3.72,692.5,15.1,,,,,,,,,,,
900,0.0138,113.772,1.107,4.5188,0.0571,0.17251,0.00429,44.5,8.316,0.105,0.01592,0.00081,63.29,1.34,342.6,6.6,,,,,,,,,,,
1200,0.0305,58.921,0.470,6.2047,0.0543,0.03913,0.00179,18.8,11.431,0.100,0.02263,0.00053,47.99,0.65,265.5,3.4,,,,,,,,,,,
1500,0.1908,50.279,0.194,7.2343,0.0417,0.00651,0.00022,2.7,13.337,0.077,0.02570,0.00014,49.10,0.20,271.3,1.0,,,,,,,,,,,
1800,0.4286,49.893,0.188,7.2868,0.0413,0.00472,0.00013,1.7,13.434,0.077,0.02477,0.00018,49.25,0.19,272.0,1.0,,,,,,,,,,,
2100,0.6088,49.845,0.195,7.1336,0.0459,0.00508,0.00025,1.9,13.150,0.085,0.02510,0.00020,49.08,0.21,271.1,1.1,,,,,,,,,,,
2500,0.7801,49.596,0.202,6.9825,0.0461,0.00481,0.00019,1.8,12.870,0.085,0.02504,0.00018,48.89,0.21,270.2,1.1,,,,,,,,,,,
3000,0.8666,49.395,0.247,7.1763,0.0442,0.00428,0.00033,1.5,13.229,0.082,0.02565,0.00021,48.87,0.27,270.1,1.4,,,,,,,,,,,
4000,0.9393,48.162,0.258,7.3867,0.0543,0.00593,0.00042,2.5,13.619,0.101,0.03299,0.00027,47.16,0.29,261.3,1.5,,,,,,,,,,,
6000,0.9797,48.986,0.279,7.3363,0.0531,0.00462,0.00080,1.7,13.526,0.098,0.02735,0.00034,48.37,0.37,267.5,1.9,,,,,,,,,,,
9000,1.0000,49.129,0.269,7.2956,0.0478,0.00405,0.00216,1.3,13.450,0.088,0.02594,0.00045,48.68,0.70,269.1,3.6,,,,,,,,,,,
Integrated,,52.190,0.084,7.1444,0.0176,0.01052,0.00012,4.9,13.170,0.033,0.02594,0.00008,49.82,0.09,274.9,0.7,,,,,,,,,,,
,,,,,,,,,,,,,,,,
SA2 Hornblende,,,,,,,,Weighted average of J from standards = 3.304e-03 +/- 6.786e-06,,,,,,,,
Laser,Cum.,40Ar/39Ar,+/-,37Ar/39Ar,+/-,36Ar/39Ar,+/-,% Atm.,Ca/K,+/-,Cl/K,+/-,40Ar*/39ArK,+/-,Age,+/-
(mW),39Ar,measured, ,measured, ,measured, ,40Ar, , , , , , ,(Ma) ,(Ma) 
300,0.0032,470.125,16.196,3.8234,0.1402,0.90740,0.03917,57.0,7.033,0.258,0.11483,0.00517,202.75,10.05,925.1,35.9
600,0.0108,132.608,2.860,3.5948,0.0820,0.28927,0.01058,64.3,6.611,0.151,0.02159,0.00141,47.48,2.77,262.9,14.3
900,0.0214,73.748,0.754,6.0381,0.0697,0.13196,0.00625,52.3,11.123,0.129,0.01577,0.00115,35.32,1.86,199.1,9.9
1200,0.0568,51.919,0.326,7.9251,0.0564,0.02681,0.00091,14.1,14.617,0.105,0.02037,0.00049,44.79,0.40,249.0,2.1
1500,0.2731,49.912,0.192,8.4740,0.0570,0.00828,0.00023,3.6,15.635,0.106,0.02392,0.00021,48.34,0.20,267.3,1.0
1800,0.4364,50.056,0.213,9.1827,0.0600,0.00768,0.00042,3.2,16.950,0.111,0.02362,0.00017,48.74,0.25,269.4,1.3
2100,0.6212,48.855,0.270,8.3607,0.0566,0.00521,0.00046,1.9,15.425,0.105,0.02400,0.00014,48.18,0.30,266.5,1.6
2500,0.7502,48.381,0.282,8.0367,0.0574,0.00749,0.00068,3.3,14.824,0.106,0.02505,0.00024,46.99,0.34,260.4,1.8
3000,0.8192,48.274,0.229,8.7926,0.0612,0.00707,0.00103,3.0,16.226,0.114,0.02395,0.00023,47.09,0.38,260.9,2.0
4000,0.8927,48.369,0.283,8.0442,0.0601,0.01015,0.00099,5.0,14.838,0.111,0.02462,0.00031,46.19,0.41,256.2,2.1
6000,0.9632,47.960,0.276,8.2090,0.0594,0.01048,0.00088,5.2,15.143,0.110,0.02360,0.00034,45.69,0.37,253.7,1.9
9000,1.0000,48.128,0.337,8.5542,0.0686,0.01215,0.00182,6.1,15.784,0.127,0.02123,0.00042,45.40,0.63,252.2,3.3
Integrated,,51.409,0.093,8.3903,0.0219,0.01483,0.00024,7.3,15.480,0.041,0.02403,0.00008,47.89,0.11,265.0,0.8
,,,,,,,,,,,,,,,,
SA3 Hornblende,,,,,,,,Weighted average of J from standards = 3.304e-03 +/- 6.786e-06,,,,,,,,
Laser,Cum.,40Ar/39Ar,+/-,37Ar/39Ar,+/-,36Ar/39Ar,+/-,% Atm.,Ca/K,+/-,Cl/K,+/-,40Ar*/39ArK,+/-,Age,+/-
(mW),39Ar,measured, ,measured, ,measured, ,40Ar, , , , , , ,(Ma) ,(Ma) 
300,0.0013,7163.615,857.122,10.0250,1.2031,5.08255,0.61209,21.0,18.515,2.237,1.85385,0.22268,5699.64,687.06,5389.4,206.5
600,0.0050,2800.009,156.479,15.1974,0.8527,2.73917,0.15426,28.9,28.164,1.596,1.01481,0.05738,2011.60,113.75,3670.0,88.7
900,0.0120,836.663,18.926,8.7892,0.2013,1.03034,0.02628,36.3,16.220,0.374,0.30637,0.00780,535.89,13.03,1838.6,28.0
1200,0.0225,336.911,7.875,7.8981,0.1955,0.36426,0.01114,31.8,14.567,0.362,0.17608,0.00449,231.03,5.90,1023.3,19.9
1500,0.0547,133.748,0.955,8.8704,0.0729,0.12338,0.00223,26.8,16.371,0.135,0.11139,0.00131,98.50,1.01,508.3,4.5
1800,0.1817,64.704,0.424,7.9171,0.0580,0.02807,0.00056,11.9,14.602,0.107,0.07861,0.00054,57.27,0.43,312.7,2.2
2100,0.3451,60.046,0.218,8.7308,0.0490,0.02112,0.00041,9.3,16.111,0.091,0.07633,0.00044,54.74,0.24,300.0,1.2
2500,0.5437,61.869,0.231,8.6685,0.0539,0.02129,0.00050,9.1,15.996,0.100,0.08280,0.00048,56.52,0.26,308.9,1.3
3000,0.6845,55.915,0.337,7.9097,0.0721,0.01651,0.00053,7.7,14.588,0.134,0.07415,0.00068,51.87,0.36,285.4,1.9
4000,0.8518,56.664,0.381,7.5525,0.0563,0.01924,0.00051,9.0,13.926,0.104,0.07256,0.00053,51.77,0.39,284.9,2.0
6000,0.9797,52.910,0.327,8.6922,0.0625,0.01460,0.00048,6.9,16.040,0.116,0.07368,0.00059,49.50,0.35,273.3,1.8
9000,1.0000,48.124,0.408,8.8457,0.0850,0.01111,0.00344,5.4,16.325,0.158,0.07171,0.00126,45.74,1.09,253.9,5.7
Integrated,,89.052,0.175,8.3216,0.0227,0.05081,0.00028,16.2,15.352,0.042,0.08614,0.00023,75.04,0.18,399.6,1.1
,,,,,,,,,,,,,,,,
SA4 Hornblende,,,,,,,,Weighted average of J from standards = 3.304e-03 +/- 6.786e-06,,,,,,,,
Laser,Cum.,40Ar/39Ar,+/-,37Ar/39Ar,+/-,36Ar/39Ar,+/-,% Atm.,Ca/K,+/-,Cl/K,+/-,40Ar*/39ArK,+/-,Age,+/-
(mW),39Ar,measured, ,measured, ,measured, ,40Ar, , , , , , ,(Ma) ,(Ma) 
300,0.0013,2050.649,277.750,8.7506,1.1965,1.46526,0.20555,21.1,16.148,2.221,0.84202,0.11563,1627.56,222.35,3342.7,207.8
600,0.0029,1655.690,168.823,8.3654,0.8601,1.28756,0.14369,22.9,15.433,1.595,0.68701,0.07123,1282.80,132.74,2987.7,151.1
900,0.0054,484.907,28.010,7.2510,0.4268,0.52552,0.05075,31.9,13.368,0.790,0.18781,0.01291,331.70,22.77,1335.1,64.8
1200,0.0122,114.269,2.657,8.2132,0.2041,0.11843,0.01287,30.1,15.151,0.378,0.11031,0.00375,80.29,4.19,424.5,19.8
1500,0.0686,54.988,0.292,7.0573,0.0447,0.02054,0.00172,10.1,13.009,0.083,0.02769,0.00056,49.65,0.58,274.1,3.0
1800,0.2533,48.792,0.288,6.8904,0.0496,0.00931,0.00042,4.6,12.700,0.092,0.01619,0.00021,46.74,0.31,259.1,1.6
2100,0.4700,47.817,0.264,6.7605,0.0429,0.00880,0.00029,4.4,12.459,0.079,0.01199,0.00013,45.90,0.27,254.8,1.4
2500,0.6099,45.632,0.272,6.8766,0.0462,0.00670,0.00030,3.2,12.674,0.086,0.00881,0.00012,44.34,0.28,246.7,1.5
3000,0.7435,49.867,0.317,6.9324,0.0564,0.01001,0.00042,4.9,12.778,0.104,0.01364,0.00017,47.62,0.33,263.6,1.7
4000,0.8625,47.523,0.253,6.9791,0.0481,0.00845,0.00038,4.2,12.864,0.089,0.01133,0.00016,45.73,0.27,253.9,1.4
6000,0.9769,52.168,0.355,7.1722,0.0577,0.01026,0.00051,4.8,13.222,0.107,0.01761,0.00022,49.88,0.38,275.2,1.9
9000,1.0000,48.686,0.657,7.1638,0.1086,0.00701,0.00253,3.2,13.206,0.201,0.01365,0.00103,47.35,0.99,262.2,5.1
Integrated,,55.562,0.123,6.9391,0.0191,0.01548,0.00025,7.3,12.790,0.035,0.01729,0.00009,51.71,0.14,284.6,0.9
,,,,,,,,,,,,,,,,
SA5 Hornblende,,,,,,,,Weighted average of J from standards = 3.304e-03 +/- 6.786e-06,,,,,,,,
Laser,Cum.,40Ar/39Ar,+/-,37Ar/39Ar,+/-,36Ar/39Ar,+/-,% Atm.,Ca/K,+/-,Cl/K,+/-,40Ar*/39ArK,+/-,Age,+/-
(mW),39Ar,measured, ,measured, ,measured, ,40Ar, , , , , , ,(Ma) ,(Ma) 
300,0.0017,1415.547,85.616,7.0386,0.4287,0.76109,0.05459,15.9,12.974,0.794,0.41248,0.02601,1196.63,73.29,2886.9,88.2
600,0.0056,728.940,18.805,12.6076,0.3339,0.42634,0.01484,17.2,23.325,0.623,0.26102,0.00771,608.87,16.19,1989.1,32.1
900,0.0111,308.088,5.511,9.5740,0.1732,0.22448,0.00875,21.3,17.677,0.322,0.11323,0.00278,243.96,5.01,1066.6,16.5
1200,0.0187,139.736,1.517,6.5564,0.0738,0.09913,0.00426,20.6,12.082,0.137,0.04697,0.00101,111.38,1.75,565.4,7.6
1500,0.0418,80.018,0.510,5.8512,0.0440,0.02976,0.00149,10.4,10.777,0.081,0.02637,0.00041,71.91,0.65,384.6,3.1
1800,0.1538,54.295,0.347,5.3625,0.0375,0.01078,0.00028,5.1,9.874,0.069,0.01244,0.00016,51.66,0.35,284.4,1.8
2100,0.3621,48.587,0.255,5.2732,0.0367,0.00640,0.00026,3.1,9.709,0.068,0.00926,0.00010,47.22,0.26,261.6,1.3
2500,0.6108,48.480,0.229,5.3198,0.0369,0.00592,0.00020,2.8,9.795,0.068,0.00793,0.00007,47.27,0.23,261.8,1.2
3000,0.8181,48.668,0.208,5.2603,0.0332,0.00617,0.00018,2.9,9.685,0.061,0.00764,0.00007,47.37,0.21,262.4,1.1
4000,0.9435,46.865,0.256,5.1798,0.0351,0.00492,0.00029,2.3,9.536,0.065,0.00635,0.00012,45.93,0.27,254.9,1.4
6000,0.9829,47.168,0.226,5.5567,0.0337,0.00818,0.00077,4.2,10.233,0.062,0.00803,0.00017,45.30,0.32,251.7,1.7
9000,1.0000,45.452,0.297,5.5517,0.0488,0.00927,0.00174,5.1,10.224,0.090,0.00618,0.00050,43.26,0.59,241.0,3.1
Integrated,,56.716,0.118,5.3752,0.0153,0.01203,0.00014,5.6,9.897,0.028,0.01140,0.00005,53.72,0.12,294.8,0.8
,,,,,,,,,,,,,,,,
SA6 Hornblende,,,,,,,,Weighted average of J from standards = 3.304e-03 +/- 6.786e-06,,,,,,,,
Laser,Cum.,40Ar/39Ar,+/-,37Ar/39Ar,+/-,36Ar/39Ar,+/-,% Atm.,Ca/K,+/-,Cl/K,+/-,40Ar*/39ArK,+/-,Age,+/-
(mW),39Ar,measured, ,measured, ,measured, ,40Ar, , , , , , ,(Ma) ,(Ma) 
300,0.0006,1001.675,68.541,5.0767,0.3566,0.95427,0.08649,28.1,9.346,0.659,0.24190,0.01894,722.43,52.47,2200.9,92.4
600,0.0017,261.278,10.227,9.2618,0.3685,0.42454,0.02894,47.8,17.097,0.684,0.05436,0.00441,137.32,8.90,675.0,36.5
900,0.0039,82.615,1.639,5.1103,0.1054,0.12914,0.01029,45.7,9.408,0.195,0.01071,0.00183,44.96,3.10,249.9,16.1
1200,0.0194,40.464,0.265,3.9956,0.0291,0.00954,0.00154,6.2,7.351,0.054,0.00406,0.00022,38.02,0.52,213.5,2.8
1500,0.1147,40.184,0.273,3.5462,0.0278,0.00285,0.00026,1.4,6.522,0.051,0.00298,0.00009,39.67,0.28,222.2,1.5
1800,0.2906,39.629,0.188,3.4496,0.0230,0.00275,0.00012,1.4,6.344,0.042,0.00280,0.00005,39.14,0.19,219.4,1.0
2100,0.5073,40.455,0.170,3.3837,0.0211,0.00238,0.00012,1.1,6.222,0.039,0.00263,0.00004,40.07,0.17,224.3,0.9
2500,0.7345,39.972,0.173,3.4120,0.0220,0.00241,0.00011,1.1,6.274,0.041,0.00253,0.00006,39.57,0.17,221.7,0.9
3000,0.8732,40.016,0.200,3.3845,0.0251,0.00234,0.00015,1.1,6.224,0.046,0.00260,0.00006,39.64,0.20,222.1,1.1
4000,0.9589,39.627,0.234,3.4287,0.0236,0.00211,0.00026,0.9,6.305,0.043,0.00273,0.00006,39.32,0.25,220.4,1.3
6000,0.9816,40.987,0.209,3.8660,0.0242,0.00115,0.00147,0.1,7.112,0.045,0.00304,0.00022,41.01,0.48,229.3,2.5
9000,1.0000,44.952,0.279,7.8920,0.0603,0.00652,0.00118,3.0,14.556,0.112,0.00427,0.00023,43.81,0.45,243.9,2.3
Integrated,,41.028,0.078,3.5361,0.0095,0.00393,0.00009,2.2,6.503,0.017,0.00295,0.00003,40.20,0.08,225.0,0.6
,,,,,,,,,,,,,,,,
SA7 Hornblende,,,,,,,,Weighted average of J from standards = 3.304e-03 +/- 6.786e-06,,,,,,,,
Laser,Cum.,40Ar/39Ar,+/-,37Ar/39Ar,+/-,36Ar/39Ar,+/-,% Atm.,Ca/K,+/-,Cl/K,+/-,40Ar*/39ArK,+/-,Age,+/-
(mW),39Ar,measured, ,measured, ,measured, ,40Ar, , , , , , ,(Ma) ,(Ma) 
300,0.0028,331.198,9.506,5.9799,0.1881,0.40008,0.02572,35.6,11.015,0.348,0.15446,0.00726,214.23,9.25,965.6,32.3
600,0.0079,123.271,2.368,4.7095,0.1145,0.17590,0.01110,41.9,8.668,0.211,0.04234,0.00218,71.84,3.45,384.3,16.6
900,0.0162,55.761,1.160,5.0664,0.1096,0.08966,0.00618,46.9,9.327,0.202,0.01395,0.00132,29.71,1.87,169.0,10.2
1200,0.0319,43.164,0.391,8.6120,0.0970,0.03083,0.00325,19.6,15.891,0.180,0.01327,0.00099,34.87,1.02,196.7,5.5
1500,0.0870,47.842,0.336,10.4881,0.0917,0.01391,0.00159,7.0,19.377,0.171,0.01135,0.00029,44.80,0.57,249.0,3.0
1800,0.2077,46.131,0.291,10.8461,0.0751,0.00813,0.00063,3.4,20.043,0.140,0.00808,0.00025,44.83,0.34,249.2,1.8
2100,0.3526,47.054,0.256,10.6045,0.0716,0.00823,0.00054,3.5,19.593,0.133,0.00802,0.00016,45.71,0.30,253.8,1.6
2500,0.5476,46.172,0.234,10.1774,0.0666,0.00736,0.00042,3.1,18.799,0.124,0.00757,0.00014,45.03,0.26,250.3,1.4
3000,0.7661,45.863,0.237,10.3125,0.0703,0.00707,0.00034,2.9,19.050,0.131,0.00760,0.00016,44.82,0.26,249.2,1.3
4000,0.8462,52.571,0.253,11.5895,0.0738,0.01259,0.00111,5.4,21.427,0.138,0.01303,0.00033,50.07,0.41,276.2,2.1
6000,0.9444,45.847,0.224,10.9258,0.0758,0.00841,0.00088,3.6,20.191,0.141,0.00856,0.00021,44.47,0.34,247.3,1.8
9000,1.0000,48.765,0.334,11.1278,0.0947,0.00814,0.00172,3.2,20.567,0.176,0.00909,0.00034,47.51,0.61,263.1,3.1
Integrated,,48.167,0.097,10.4999,0.0272,0.01145,0.00026,5.4,19.399,0.051,0.00926,0.00008,45.86,0.12,254.5,0.8
,,,,,,,,,,,,,,,,
SA9 Hornblende,,,,,,,,Weighted average of J from standards = 3.304e-03 +/- 6.786e-06,,,,,,,,
Laser,Cum.,40Ar/39Ar,+/-,37Ar/39Ar,+/-,36Ar/39Ar,+/-,% Atm.,Ca/K,+/-,Cl/K,+/-,40Ar*/39ArK,+/-,Age,+/-
(mW),39Ar,measured, ,measured, ,measured, ,40Ar, , , , , , ,(Ma) ,(Ma) 
300,0.0073,191.582,3.899,2.8345,0.0658,0.36713,0.01345,56.5,5.211,0.121,0.05531,0.00295,83.43,3.80,439.3,17.8
600,0.0183,97.461,1.359,2.8051,0.0481,0.19447,0.00873,58.8,5.156,0.089,0.01597,0.00188,40.25,2.55,225.3,13.4
900,0.0329,68.698,0.815,5.8095,0.0831,0.10207,0.00664,43.3,10.700,0.154,0.01325,0.00119,39.09,2.00,219.2,10.6
1200,0.0868,54.830,0.435,9.1264,0.0842,0.02444,0.00189,11.9,16.846,0.156,0.02004,0.00039,48.55,0.68,268.4,3.5
1500,0.2553,51.398,0.255,8.7393,0.0538,0.01129,0.00046,5.2,16.127,0.100,0.02360,0.00014,48.97,0.28,270.6,1.5
1800,0.4867,50.028,0.339,8.6864,0.0668,0.00678,0.00022,2.7,16.029,0.124,0.02323,0.00030,48.92,0.34,270.3,1.8
2100,0.6317,48.629,0.263,8.6363,0.0596,0.00681,0.00046,2.8,15.936,0.111,0.02385,0.00029,47.50,0.29,263.0,1.5
2500,0.7231,48.019,0.325,8.7753,0.0676,0.00978,0.00081,4.6,16.194,0.126,0.02283,0.00036,46.02,0.40,255.4,2.1
3000,0.7913,49.781,0.281,8.5840,0.0652,0.01129,0.00106,5.4,15.839,0.121,0.02242,0.00044,47.32,0.42,262.1,2.2
4000,0.8730,48.599,0.253,7.9638,0.0543,0.01120,0.00087,5.6,14.689,0.101,0.02367,0.00028,46.10,0.36,255.8,1.9
6000,0.9780,48.136,0.369,7.2507,0.0584,0.00871,0.00046,4.2,13.367,0.108,0.02165,0.00028,46.30,0.39,256.8,2.0
9000,1.0000,48.156,0.459,8.1090,0.0928,0.01601,0.00310,8.6,14.958,0.172,0.02314,0.00090,44.24,1.02,246.1,5.3
Integrated,,51.578,0.119,8.3416,0.0231,0.01591,0.00027,7.9,15.389,0.043,0.02299,0.00011,47.73,0.14,264.2,0.9
,,,,,,,,,,,,,,,,
VS01-06 Hornblende,,,,,,,,Weighted average of J from standards = 3.304e-03 +/- 6.786e-06,,,,,,,,
Laser,Cum.,40Ar/39Ar,+/-,37Ar/39Ar,+/-,36Ar/39Ar,+/-,% Atm.,Ca/K,+/-,Cl/K,+/-,40Ar*/39ArK,+/-,Age,+/-
(mW),39Ar,measured, ,measured, ,measured, ,40Ar, , , , , , ,(Ma) ,(Ma) 
300,0.0002,3069.624,1476.002,15.9899,7.7039,2.69177,1.31196,25.9,29.648,14.435,0.72678,0.35348,2299.31,1119.14,3881.5,776.0
600,0.0004,4676.085,2835.426,42.3364,25.6775,4.82091,2.93852,30.4,79.883,49.823,0.70009,0.42870,3346.90,2089.01,4491.8,1032.7
900,0.0011,1170.366,220.280,12.0992,2.2827,0.78087,0.15463,19.6,22.377,4.255,0.11865,0.02613,947.97,180.43,2559.7,260.3
1200,0.0042,240.864,11.278,8.0393,0.3807,0.15495,0.02068,18.8,14.829,0.706,0.04001,0.00394,196.68,10.91,903.3,39.4
1500,0.0346,69.450,0.375,8.3729,0.0590,0.01818,0.00156,6.8,15.447,0.109,0.01287,0.00049,65.03,0.59,351.2,2.9
1800,0.2214,46.807,0.337,7.2518,0.0540,0.00604,0.00032,2.6,13.369,0.100,0.00762,0.00012,45.75,0.35,254.0,1.8
2100,0.4509,43.356,0.265,7.0258,0.0490,0.00485,0.00036,2.1,12.951,0.091,0.00727,0.00010,42.61,0.28,237.7,1.5
2600,0.7166,45.230,0.212,7.9862,0.0565,0.00662,0.00028,3.0,14.730,0.105,0.00763,0.00011,44.07,0.22,245.3,1.2
3500,0.8471,42.417,0.224,6.4475,0.0438,0.00599,0.00036,3.0,11.880,0.081,0.00658,0.00010,41.28,0.25,230.7,1.3
5000,0.9501,45.856,0.280,7.2124,0.0565,0.00750,0.00065,3.7,13.296,0.105,0.00751,0.00016,44.36,0.34,246.8,1.7
9000,1.0000,41.283,0.261,8.0823,0.0665,0.00608,0.00104,2.9,14.908,0.123,0.00727,0.00019,40.27,0.40,225.4,2.1
Integrated,,48.248,0.120,7.3757,0.0232,0.00890,0.00019,4.3,13.599,0.043,0.00800,0.00006,46.37,0.13,257.2,0.8
,,,,,,,,,,,,,,,,
VS02-06 Hornblende,,,,,,,,Weighted average of J from standards = 3.304e-03 +/- 6.786e-06,,,,,,,,
Laser,Cum.,40Ar/39Ar,+/-,37Ar/39Ar,+/-,36Ar/39Ar,+/-,% Atm.,Ca/K,+/-,Cl/K,+/-,40Ar*/39ArK,+/-,Age,+/-
(mW),39Ar,measured, ,measured, ,measured, ,40Ar, , , , , , ,(Ma) ,(Ma) 
300,0.0008,3998.759,285.555,4.4259,0.3261,1.80843,0.13280,13.4,8.144,0.602,0.67752,0.04907,3474.68,249.16,4553.9,119.0
600,0.0032,1267.785,46.476,5.3282,0.2037,0.75393,0.03073,17.5,9.810,0.376,0.42403,0.01603,1049.01,38.91,2699.9,51.9
900,0.0073,439.182,7.497,5.0603,0.0915,0.28083,0.00812,18.8,9.316,0.169,0.20468,0.00414,357.73,6.50,1407.7,17.8
1200,0.0130,205.221,2.427,4.9695,0.0639,0.09343,0.00483,13.3,9.148,0.118,0.13542,0.00217,178.54,2.57,836.5,9.6
1500,0.0526,65.017,0.274,3.6669,0.0213,0.01618,0.00059,6.9,6.744,0.039,0.03596,0.00030,60.63,0.32,329.4,1.6
1800,0.1608,46.024,0.232,3.4754,0.0214,0.00575,0.00024,3.1,6.391,0.039,0.01893,0.00015,44.66,0.24,248.3,1.2
2100,0.2926,42.012,0.201,3.4148,0.0246,0.00436,0.00023,2.5,6.280,0.045,0.01675,0.00016,41.04,0.21,229.4,1.1
2600,0.5109,42.347,0.233,3.4236,0.0254,0.00420,0.00015,2.3,6.296,0.047,0.01565,0.00010,41.43,0.23,231.5,1.2
3500,0.7694,43.766,0.212,3.4589,0.0233,0.00437,0.00011,2.4,6.361,0.043,0.01681,0.00015,42.80,0.21,238.6,1.1
5000,0.8907,41.902,0.196,3.4997,0.0214,0.00376,0.00023,2.0,6.436,0.039,0.01484,0.00012,41.12,0.21,229.8,1.1
9000,1.0000,44.760,0.191,3.8748,0.0239,0.00473,0.00028,2.5,7.128,0.044,0.01764,0.00013,43.73,0.21,243.5,1.1
Integrated,,52.872,0.107,3.5262,0.0099,0.00981,0.00010,5.0,6.485,0.018,0.02034,0.00006,50.32,0.11,277.5,0.8
,,,,,,,,,,,,,,,,
VS03-06 Hornblende,,,,,,,,Weighted average of J from standards = 3.304e-03 +/- 6.786e-06,,,,,,,,
Laser,Cum.,40Ar/39Ar,+/-,37Ar/39Ar,+/-,36Ar/39Ar,+/-,% Atm.,Ca/K,+/-,Cl/K,+/-,40Ar*/39ArK,+/-,Age,+/-
(mW),39Ar,measured, ,measured, ,measured, ,40Ar, , , , , , ,(Ma) ,(Ma) 
300,0.0008,2372.011,182.267,6.1737,0.4803,2.62912,0.20426,32.7,11.374,0.888,1.20337,0.09295,1601.98,124.18,3318.6,117.6
600,0.0025,1260.544,72.007,8.4226,0.4855,1.41058,0.08369,33.0,15.539,0.901,0.69246,0.04000,848.98,49.35,2411.0,77.3
900,0.0048,866.455,35.566,7.4891,0.3104,1.03627,0.04554,35.3,13.809,0.575,0.47624,0.01987,563.52,23.84,1897.1,49.7
1200,0.0089,461.000,11.992,10.3424,0.2709,0.54706,0.01584,34.9,19.105,0.504,0.26953,0.00724,302.13,8.25,1249.0,24.6
1500,0.0138,311.066,5.380,9.0906,0.1665,0.37000,0.01082,34.9,16.779,0.309,0.21319,0.00410,203.59,4.45,928.1,15.9
1800,0.0332,92.026,0.492,5.1024,0.0364,0.04929,0.00138,15.4,9.393,0.067,0.09932,0.00120,78.08,0.61,414.1,2.9
2100,0.1412,50.255,0.236,4.0713,0.0306,0.01141,0.00043,6.1,7.490,0.056,0.06049,0.00050,47.29,0.26,261.9,1.3
2600,0.2868,47.113,0.225,4.0151,0.0276,0.00976,0.00026,5.5,7.386,0.051,0.05673,0.00041,44.62,0.23,248.1,1.2
3500,0.5714,49.869,0.220,4.0700,0.0250,0.00951,0.00014,5.0,7.488,0.046,0.06032,0.00034,47.46,0.22,262.8,1.1
5000,0.8617,42.551,0.175,4.0227,0.0235,0.00628,0.00013,3.7,7.400,0.043,0.05349,0.00038,41.08,0.17,229.6,0.9
9000,1.0000,44.320,0.187,4.2890,0.0244,0.00709,0.00019,4.0,7.892,0.045,0.05458,0.00030,42.64,0.19,237.8,1.0
Integrated,,56.273,0.113,4.1661,0.0118,0.02016,0.00012,10.0,7.665,0.022,0.06237,0.00018,50.74,0.11,279.6,0.8
,,,,,,,,,,,,,,,,
VS05-06 Hornblende,,,,,,,,Weighted average of J from standards = 3.304e-03 +/- 6.786e-06,,,,,,,,
Laser,Cum.,40Ar/39Ar,+/-,37Ar/39Ar,+/-,36Ar/39Ar,+/-,% Atm.,Ca/K,+/-,Cl/K,+/-,40Ar*/39ArK,+/-,Age,+/-
(mW),39Ar,measured, ,measured, ,measured, ,40Ar, , , , , , ,(Ma) ,(Ma) 
300,0.0029,722.748,9.052,1.9962,0.0331,0.60219,0.01178,24.6,3.668,0.061,0.40936,0.00679,545.63,7.68,1859.4,16.3
600,0.0070,488.798,3.871,4.4122,0.0317,0.46025,0.00881,27.8,8.119,0.059,0.35849,0.00415,354.11,4.00,1397.8,11.0
900,0.0104,316.828,3.227,5.2167,0.0683,0.37668,0.00806,35.0,9.605,0.126,0.24120,0.00320,206.58,3.14,938.8,11.1
1200,0.0142,165.288,1.789,7.4172,0.0882,0.17124,0.00628,30.3,13.676,0.163,0.21565,0.00279,115.77,2.26,584.4,9.8
1500,0.0257,96.293,0.776,6.0581,0.0550,0.05169,0.00169,15.4,11.160,0.102,0.11488,0.00110,81.77,0.86,431.5,4.0
1800,0.1078,52.536,0.327,4.4023,0.0300,0.01072,0.00036,5.4,8.101,0.055,0.04748,0.00045,49.81,0.34,274.9,1.7
2100,0.2516,48.292,0.268,4.2745,0.0295,0.00771,0.00025,4.1,7.865,0.054,0.04094,0.00035,46.43,0.27,257.5,1.4
2600,0.4383,48.942,0.252,4.3514,0.0295,0.00810,0.00017,4.2,8.007,0.054,0.04291,0.00031,46.98,0.25,260.3,1.3
3500,0.7528,44.674,0.211,4.2915,0.0265,0.00544,0.00009,2.9,7.896,0.049,0.03744,0.00026,43.48,0.21,242.2,1.1
5000,0.8918,45.566,0.206,4.6557,0.0300,0.00659,0.00020,3.5,8.568,0.055,0.03812,0.00025,44.07,0.21,245.3,1.1
9000,1.0000,44.667,0.173,4.6575,0.0240,0.00633,0.00033,3.4,8.572,0.044,0.03799,0.00027,43.25,0.20,241.0,1.0
Integrated,,52.520,0.111,4.4289,0.0123,0.01297,0.00010,6.7,8.150,0.023,0.04459,0.00013,49.13,0.11,271.4,0.8

All errors are reported at the 1-sigma level,,,,,,,,,,,,,,,,
The standard mineral MMhb-1 with an age of 513.9 Ma was used to calculate J (see text),,,,,,,,,,,,,,,,
,,,,,,,,,,,,,,,,
